# Supplementary material for: Resveratrol and Its Analogue 4,4′-Dihydroxy-trans-stilbene Inhibit Lewis Lung Carcinoma Growth In Vivo through Apoptosis, Autophagy and Modulation of the Tumour Microenvironment in a Murine Model
Source: MDPI journal article supplement (doi:10.3390/biomedicines10081784), 2022-07-25
Supplement: s1 [file s1]

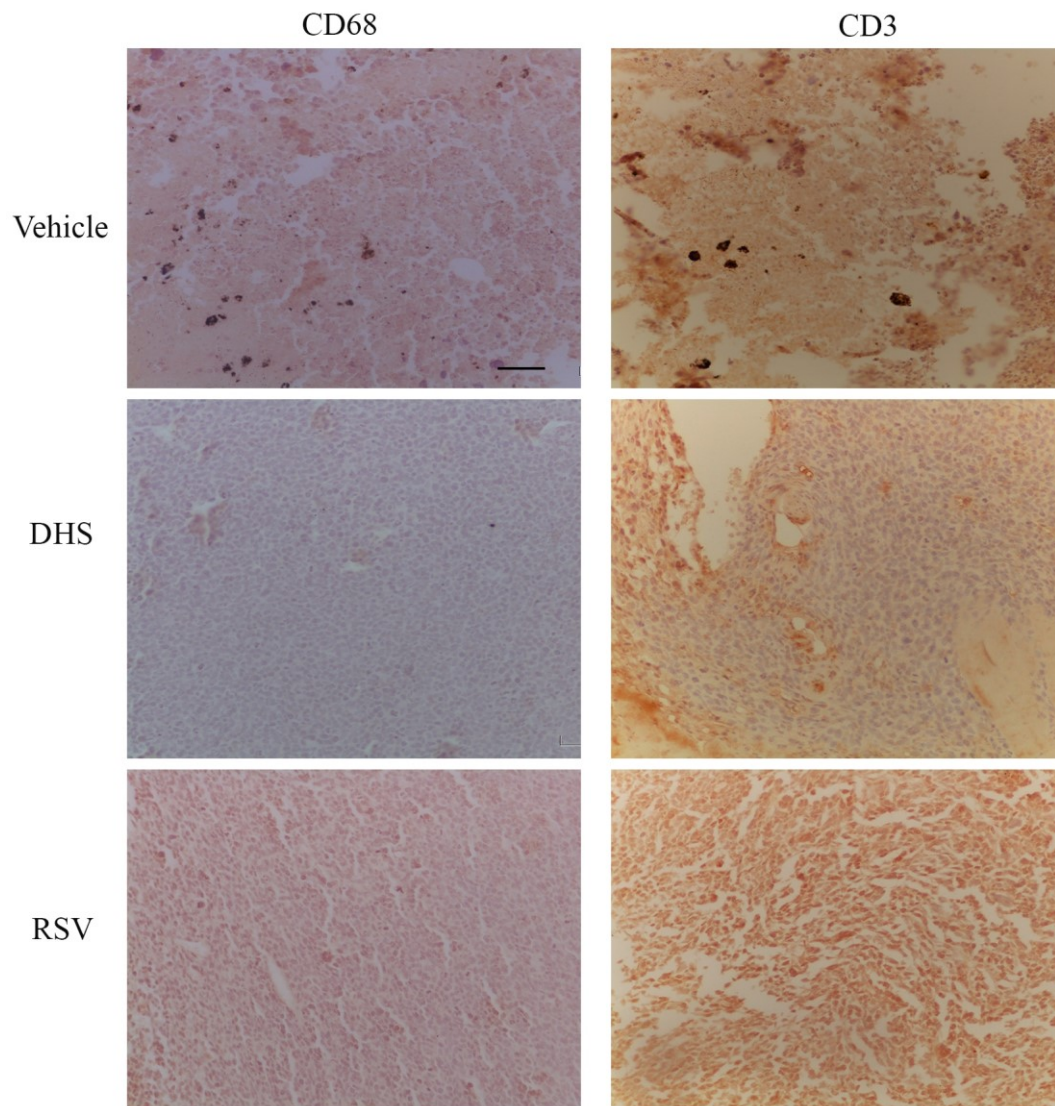

**Figure S1.** Representative images of CD68 and CD3 immunostaining in vehicle, DHS, and RSV tumour masses (scale bar = 100  $\mu$ m; 20 $\times$  magnification).
